# Supplementary material for: Transcriptomic analysis between Normal and high-intake feeding geese provides insight into adipose deposition and susceptibility to fatty liver in migratory birds
Source: PubMed Central journal article supplement (PMC6518675; doi:10.1186/s12864-019-5765-3), 2019-05-14
Supplement: 12864_2019_5765_MOESM3_ESM.pdf [file 12864_2019_5765_MOESM3_ESM.pdf]

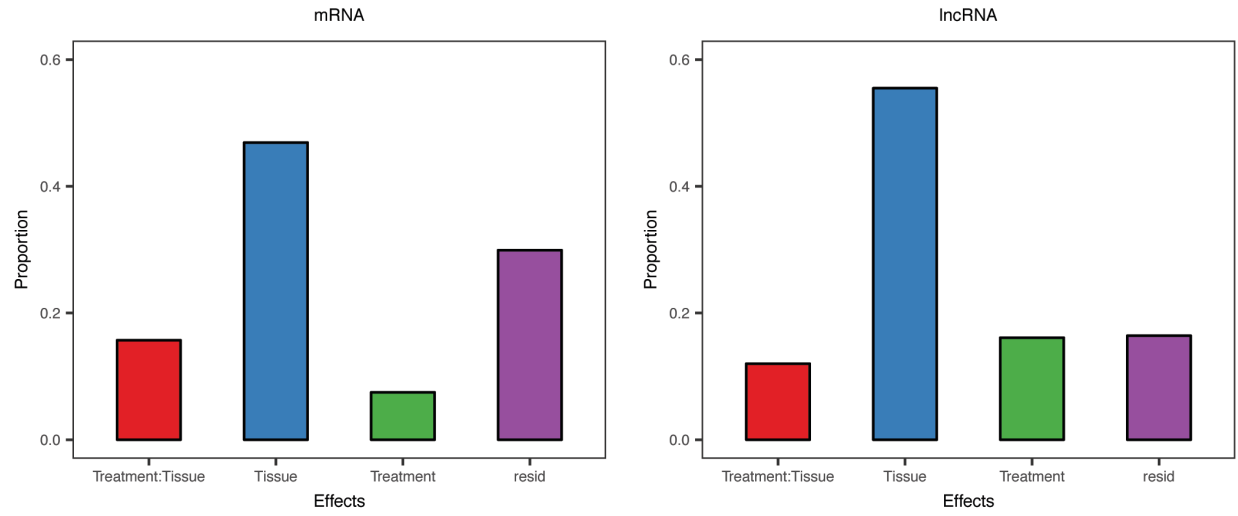

**Figure S3.** Principle components variance analysis of mRNA and lncRNA profiles.
