# Supplementary material for: Transcriptomic analysis between Normal and high-intake feeding geese provides insight into adipose deposition and susceptibility to fatty liver in migratory birds
Source: PubMed Central journal article supplement (PMC6518675; doi:10.1186/s12864-019-5765-3), 2019-05-14
Supplement: 12864_2019_5765_MOESM7_ESM.pdf [file 12864_2019_5765_MOESM7_ESM.pdf]

| <b>Day</b> | <b>t-statistics</b> | <b>p-value</b> | <b>Fold-change</b> |
|------------|---------------------|----------------|--------------------|
| Day 1      | -0.3176             | 0.758          | 1.105629           |
| Day 4      | -0.3708             | 0.7194         | 1.021425           |
| Day 7      | -2.1722             | 0.05791        | 1.105437           |
| Day 10     | -3.3754             | 0.008187       | 1.158945           |
| Day 13     | -4.8258             | 0.0009394      | 1.179954           |
| Day 16     | -5.0336             | 0.0007059      | 1.287549           |
| Day 19     | -4.9089             | 0.0008373      | 1.323378           |

**Table S1.** Paired t-test of body weights between normal and high dietary group during the fattening process.
