# Supplementary material for: Transcriptomic analysis between Normal and high-intake feeding geese provides insight into adipose deposition and susceptibility to fatty liver in migratory birds
Source: PubMed Central journal article supplement (PMC6518675; doi:10.1186/s12864-019-5765-3), 2019-05-14
Supplement: 12864_2019_5765_MOESM8_ESM.pdf [file 12864_2019_5765_MOESM8_ESM.pdf]

| <b>Tissue</b>      | <b>t-statistics</b> | <b>p-value</b> | <b>Fold-change</b> |
|--------------------|---------------------|----------------|--------------------|
| Liver              | -4.6895             | 0.0011         | 3.3473             |
| Abdominal adipose  | -2.2602             | 0.0502         | 1.6541             |
| Breast muscle      | -0.1840             | 0.8581         | 1.0099             |
| Leg muscle         | -4.0206             | 0.0030         | 1.2622             |
| Heart              | 0.0899              | 0.9303         | 0.9956             |
| Duodenum           | -2.3459             | 0.0436         | 1.2952             |
| Gizzard            | -0.1019             | 0.9210         | 1.0145             |
| Glandular stomach  | -3.2523             | 0.0099         | 1.3282             |
| Spleen             | -3.0499             | 0.0138         | 1.8256             |
| Bursa of fabricius | 4.6993              | 0.0011         | 0.5700             |

**Table S2.** Paired t-test of relative tissue weight between normal and high dietary group. Relative weight = absolute weight/body weight.
