# Supplementary material for: Transcriptomic analysis between Normal and high-intake feeding geese provides insight into adipose deposition and susceptibility to fatty liver in migratory birds
Source: PubMed Central journal article supplement (PMC6518675; doi:10.1186/s12864-019-5765-3), 2019-05-14
Supplement: 12864_2019_5765_MOESM9_ESM.pdf [file 12864_2019_5765_MOESM9_ESM.pdf]

| <b>lncRNA</b> | <b>mRNA</b> | <b>Coefficients</b> | <b>p-value</b> | <b>mRNA Description</b>                                        |
|---------------|-------------|---------------------|----------------|----------------------------------------------------------------|
| XLOC_026991   | B3GALT2     | -0.994              | 4.21e-05       | Galactosyltransferase                                          |
| XLOC_031116   | NCS1        | 0.986               | 3.01e-04       | Ca, cAMP and lipid signaling                                   |
| XLOC_002528   | GJD2        | 0.983               | 3.45e-04       | Development Slit-Robo signaling                                |
| XLOC_292472   | FERMT2      | 0.977               | 8.07e-04       | Phosphatidylinositol-3,4,5-triphosphate binding                |
| XLOC_025867   | DERL1       | 0.974               | 9.42e-04       | Degradation in endoplasmic reticulum protein                   |
| XLOC_0292472  | ERAL1       | -0.971              | 1.22e-03       | GTPase that localizes to the mitochondrion                     |
| XLOC_140330   | FRMD4B      | 0.969               | 1.44e-03       | Membrane response to insulin receptor signaling                |
| XLOC_005028   | HOXA10      | 0.960               | 2.32e-03       | Transcription factor                                           |
| XLOC_189739   | RASSF8      | 0.952               | 3.34e-03       | Maintaining adherens junction function in epithelial cells     |
| XLOC_277626   | ZFAT        | 0.928               | 7.60e-03       | Transcription factor in regulation apoptosis and cell survival |

**Figure S3.** Top 10 highly correlated mRNA-lncRNA pairs within 10Kb of each other.
